# Supplementary material for: Epigenetic and Transcriptomic Characterization of Pure Adipocyte Fractions From Obese Pigs Identifies Candidate Pathways Controlling Metabolism
Source: Front Genet. 2019 Dec 17;10:1268. doi: 10.3389/fgene.2019.01268 (PMC6927937; doi:10.3389/fgene.2019.01268)
Supplement: Supplementary Table S2 — Gene Enrichment Analysis. [file Table_2.xlsx]

## Sheet: 1.mDNAcap_KEGG
	Pathway	ID	genes in the pathway	gene set genes	Expected geness	Ration of enrichment	RawP	adjP
KEGG pathway	Metabolic pathways	1100	1130	178	85.42	2.08	5.4e-21	1.13e-18
KEGG pathway	MAPK signaling pathway	4010	268	69	20.26	3.41	7.91e-20	1.65e-17
KEGG pathway	Pathways in cancer	5200	326	76	24.64	3.08	5.92e-19	1.24e-16
KEGG pathway	Calcium signaling pathway	4020	177	51	13.38	3.81	2.98e-17	6.23e-15
KEGG pathway	Axon guidance	4360	129	40	9.75	4.1	4.87e-15	1.02e-12
KEGG pathway	Endocytosis	4144	201	50	15.19	3.29	3.83e-14	8e-12
KEGG pathway	Tight junction	4530	132	38	9.98	3.81	3.2e-13	6.69e-11
KEGG pathway	Regulation of actin cytoskeleton	4810	213	47	16.1	2.92	2.15e-11	4.49e-09
KEGG pathway	Wnt signaling pathway	4310	150	38	11.34	3.35	2.32e-11	4.85e-09
KEGG pathway	Insulin signaling pathway	4910	138	36	10.43	3.45	3.11e-11	6.5e-09
KEGG pathway	Pancreatic secretion	4972	101	30	7.63	3.93	4.03e-11	8.42e-09
KEGG pathway	GnRH signaling pathway	4912	101	29	7.63	3.8	2.09e-10	4.37e-08
KEGG pathway	Adherens junction	4520	73	24	5.52	4.35	3.43e-10	7.17e-08
KEGG pathway	Vascular smooth muscle contraction	4270	116	31	8.77	3.54	3.69e-10	7.71e-08
KEGG pathway	Fc gamma R-mediated phagocytosis	4666	94	27	7.11	3.8	8.6e-10	1.8e-07
KEGG pathway	Phosphatidylinositol signaling system	4070	78	24	5.9	4.07	1.58e-09	3.3e-07
KEGG pathway	Glycerophospholipid metabolism	564	80	24	6.05	3.97	2.79e-09	5.83e-07
KEGG pathway	ErbB signaling pathway	4012	87	25	6.58	3.8	3.55e-09	7.42e-07
KEGG pathway	Focal adhesion	4510	200	41	15.12	2.71	4.01e-09	8.38e-07
KEGG pathway	Leukocyte transendothelial migration	4670	116	29	8.77	3.31	7.13e-09	1.49e-06
KEGG pathway	Chagas disease (American trypanosomiasis)	5142	104	27	7.86	3.43	9.72e-09	2.03e-06
KEGG pathway	Glycerolipid metabolism	561	50	18	3.78	4.76	1.06e-08	2.22e-06
KEGG pathway	Fc epsilon RI signaling pathway	4664	79	23	5.97	3.85	1.12e-08	2.34e-06
KEGG pathway	Melanogenesis	4916	101	26	7.63	3.41	2.19e-08	4.58e-06
KEGG pathway	Salivary secretion	4970	89	24	6.73	3.57	2.85e-08	5.96e-06
KEGG pathway	Gap junction	4540	90	24	6.8	3.53	3.61e-08	7.54e-06
KEGG pathway	Ubiquitin mediated proteolysis	4120	135	30	10.2	2.94	7.13e-08	1.49e-05
KEGG pathway	Osteoclast differentiation	4380	128	29	9.68	3	7.48e-08	1.56e-05
KEGG pathway	Chemokine signaling pathway	4062	189	37	14.29	2.59	7.9e-08	1.65e-05
KEGG pathway	Adipocytokine signaling pathway	4920	68	20	5.14	3.89	8.29e-08	1.73e-05
KEGG pathway	B cell receptor signaling pathway	4662	75	21	5.67	3.7	1.02e-07	2.13e-05
KEGG pathway	mTOR signaling pathway	4150	52	17	3.93	4.32	1.39e-07	2.91e-05
KEGG pathway	Bile secretion	4976	71	20	5.37	3.73	1.82e-07	3.8e-05
KEGG pathway	Neuroactive ligand-receptor interaction	4080	272	46	20.56	2.24	2.28e-07	4.77e-05
KEGG pathway	Amoebiasis	5146	106	25	8.01	3.12	2.56e-07	5.35e-05
KEGG pathway	Gastric acid secretion	4971	74	20	5.59	3.58	3.82e-07	7.98e-05
KEGG pathway	Prostate cancer	5215	89	22	6.73	3.27	5.55e-07	0.0001
KEGG pathway	Cytokine-cytokine receptor interaction	4060	265	44	20.03	2.2	6.93e-07	0.0001
KEGG pathway	VEGF signaling pathway	4370	76	20	5.74	3.48	6.11e-07	0.0001
KEGG pathway	Neurotrophin signaling pathway	4722	127	27	9.6	2.81	7.99e-07	0.0002
KEGG pathway	Type II diabetes mellitus	4930	48	15	3.63	4.13	1.44e-06	0.0003
KEGG pathway	T cell receptor signaling pathway	4660	108	24	8.16	2.94	1.39e-06	0.0003
KEGG pathway	Complement and coagulation cascades	4610	69	18	5.22	3.45	2.52e-06	0.0005
KEGG pathway	Alzheimer's disease	5010	167	31	12.62	2.46	2.79e-06	0.0006
KEGG pathway	Renal cell carcinoma	5211	70	18	5.29	3.4	3.16e-06	0.0007
KEGG pathway	Peroxisome	4146	79	19	5.97	3.18	4.98e-06	0.001
KEGG pathway	Glioma	5214	65	17	4.91	3.46	4.59e-06	0.001
KEGG pathway	Chronic myeloid leukemia	5220	73	18	5.52	3.26	6.02e-06	0.0013
KEGG pathway	Notch signaling pathway	4330	47	14	3.55	3.94	6.06e-06	0.0013
KEGG pathway	Cell adhesion molecules (CAMs)	4514	133	26	10.05	2.59	6.52e-06	0.0014
KEGG pathway	Maturity onset diabetes of the young	4950	25	10	1.89	5.29	6.81e-06	0.0014
KEGG pathway	Hepatitis C	5160	134	26	10.13	2.57	7.51e-06	0.0016
KEGG pathway	Oocyte meiosis	4114	112	23	8.47	2.72	9.34e-06	0.002
KEGG pathway	Glycosaminoglycan biosynthesis - heparan sulfate	534	26	10	1.97	5.09	1.03e-05	0.0022
KEGG pathway	Long-term potentiation	4720	70	17	5.29	3.21	1.34e-05	0.0028
KEGG pathway	Small cell lung cancer	5222	85	19	6.43	2.96	1.55e-05	0.0032
KEGG pathway	Vibrio cholerae infection	5110	54	14	4.08	3.43	3.48e-05	0.0073
KEGG pathway	Epithelial cell signaling in Helicobacter pylori infection	5120	68	16	5.14	3.11	3.64e-05	0.0076
KEGG pathway	Colorectal cancer	5210	62	15	4.69	3.2	4.47e-05	0.0093
KEGG pathway	TGF-beta signaling pathway	4350	84	18	6.35	2.83	4.67e-05	0.0098
KEGG pathway	Toxoplasmosis	5145	132	24	9.98	2.41	5.02e-05	0.0105
KEGG pathway	N-Glycan biosynthesis	510	49	13	3.7	3.51	5.07e-05	0.0106
KEGG pathway	Viral myocarditis	5416	70	16	5.29	3.02	5.32e-05	0.0111
KEGG pathway	Long-term depression	4730	70	16	5.29	3.02	5.32e-05	0.0111
KEGG pathway	Acute myeloid leukemia	5221	57	14	4.31	3.25	6.66e-05	0.0139
KEGG pathway	ABC transporters	2010	44	12	3.33	3.61	7.3e-05	0.0153
KEGG pathway	Endometrial cancer	5213	52	13	3.93	3.31	9.89e-05	0.0207
KEGG pathway	Jak-STAT signaling pathway	4630	155	26	11.72	2.22	0.0001	0.0209
KEGG pathway	Non-small cell lung cancer	5223	54	13	4.08	3.18	0.0001	0.0209
KEGG pathway	Huntington's disease	5016	183	29	13.83	2.1	0.0001	0.0209
KEGG pathway	Pancreatic cancer	5212	70	15	5.29	2.83	0.0002	0.0418
KEGG pathway	Apoptosis	4210	87	17	6.58	2.59	0.0002	0.0418
KEGG pathway	Basal cell carcinoma	5217	55	13	4.16	3.13	0.0002	0.0418
KEGG pathway	Melanoma	5218	71	15	5.37	2.79	0.0002	0.0418
KEGG pathway	Aldosterone-regulated sodium reabsorption	4960	42	11	3.17	3.46	0.0002	0.0418
* Webgestalt: KEGG pathway enrichment anaysis for all mDNAcap DMRs. Only Bonferroni adjusted pathways (adjP < 0.05) is included.

## Sheet: 2.RNAseq_KEGG
	Pathway	ID	genes in the pathway	gene set genes	Expected geness	Ration of enrichment	RawP	adjP
KEGG pathway	Ribosome	3010	92	24	2.33	10.28	6.17e-18	1.01e-15
KEGG pathway	Metabolic pathways	1100	1130	83	28.66	2.9	7.7e-18	1.26e-15
KEGG pathway	Pathways in cancer	5200	326	33	8.27	3.99	2.12e-11	3.48e-09
KEGG pathway	PPAR signaling pathway	3320	70	15	1.78	8.45	2.07e-10	3.39e-08
KEGG pathway	Focal adhesion	4510	200	24	5.07	4.73	3.65e-10	5.99e-08
KEGG pathway	Insulin signaling pathway	4910	138	20	3.5	5.71	3.69e-10	6.05e-08
KEGG pathway	Endocytosis	4144	201	22	5.1	4.31	1.09e-08	1.79e-06
KEGG pathway	Adipocytokine signaling pathway	4920	68	12	1.72	6.96	1.32e-07	2.16e-05
KEGG pathway	Acute myeloid leukemia	5221	57	11	1.45	7.61	1.69e-07	2.77e-05
KEGG pathway	Glycolysis / Gluconeogenesis	10	65	11	1.65	6.67	6.81e-07	0.0001
KEGG pathway	ECM-receptor interaction	4512	85	12	2.16	5.57	1.6e-06	0.0003
KEGG pathway	MAPK signaling pathway	4010	268	22	6.8	3.24	1.68e-06	0.0003
KEGG pathway	Hepatitis C	5160	134	15	3.4	4.41	1.73e-06	0.0003
KEGG pathway	Notch signaling pathway	4330	47	9	1.19	7.55	2.41e-06	0.0004
KEGG pathway	Jak-STAT signaling pathway	4630	155	16	3.93	4.07	2.33e-06	0.0004
KEGG pathway	Axon guidance	4360	129	14	3.27	4.28	5.49e-06	0.0009
KEGG pathway	Leukocyte transendothelial migration	4670	116	13	2.94	4.42	8.28e-06	0.0014
KEGG pathway	Calcium signaling pathway	4020	177	16	4.49	3.56	1.29e-05	0.0021
KEGG pathway	Lysosome	4142	121	13	3.07	4.24	1.31e-05	0.0021
KEGG pathway	Gap junction	4540	90	11	2.28	4.82	1.78e-05	0.0029
KEGG pathway	Osteoclast differentiation	4380	128	13	3.25	4	2.41e-05	0.004
KEGG pathway	Peroxisome	4146	79	10	2	4.99	3.13e-05	0.0051
KEGG pathway	Malaria	5144	51	8	1.29	6.18	4.05e-05	0.0066
KEGG pathway	Systemic lupus erythematosus	5322	136	13	3.45	3.77	4.58e-05	0.0075
KEGG pathway	TGF-beta signaling pathway	4350	84	10	2.13	4.69	5.35e-05	0.0088
KEGG pathway	Cytokine-cytokine receptor interaction	4060	265	19	6.72	2.83	5.48e-05	0.009
KEGG pathway	Pyruvate metabolism	620	40	7	1.01	6.9	5.95e-05	0.0098
KEGG pathway	Complement and coagulation cascades	4610	69	9	1.75	5.14	6.1e-05	0.01
KEGG pathway	Chagas disease (American trypanosomiasis)	5142	104	11	2.64	4.17	6.92e-05	0.0113
KEGG pathway	Melanoma	5218	71	9	1.8	5	7.66e-05	0.0126
KEGG pathway	Salivary secretion	4970	89	10	2.26	4.43	8.8e-05	0.0144
KEGG pathway	Neurotrophin signaling pathway	4722	127	12	3.22	3.72	9.93e-05	0.0163
KEGG pathway	Chemokine signaling pathway	4062	189	15	4.79	3.13	0.0001	0.0164
KEGG pathway	NOD-like receptor signaling pathway	4621	58	8	1.47	5.44	0.0001	0.0164
KEGG pathway	Regulation of actin cytoskeleton	4810	213	16	5.4	2.96	0.0001	0.0164
KEGG pathway	Biosynthesis of unsaturated fatty acids	1040	21	5	0.53	9.39	0.0002	0.0328
KEGG pathway	Type II diabetes mellitus	4930	48	7	1.22	5.75	0.0002	0.0328
KEGG pathway	Neuroactive ligand-receptor interaction	4080	272	18	6.9	2.61	0.0002	0.0328
KEGG pathway	p53 signaling pathway	4115	68	8	1.72	4.64	0.0003	0.0492
KEGG pathway	Small cell lung cancer	5222	85	9	2.16	4.17	0.0003	0.0492
KEGG pathway	Endometrial cancer	5213	52	7	1.32	5.31	0.0003	0.0492
KEGG pathway	mTOR signaling pathway	4150	52	7	1.32	5.31	0.0003	0.0492
KEGG pathway	Glycerolipid metabolism	561	50	7	1.27	5.52	0.0003	0.0492
* Webgestalt: KEGG pathway enrichment anaysis for all DE genes. Only Bonferroni adjusted pathways (adjP < 0.05) is included.

## Sheet: 3.RRBS_5.5_KEGG
	Pathway	ID	genes in the pathway	gene set genes	Expected geness	Ration of enrichment	RawP	adjP
KEGG pathway	Focal adhesion	4510	200	12	2.01	5.98	1.01e-06	6.03e-05
KEGG pathway	Phosphatidylinositol signaling system	4070	78	8	0.78	10.22	1.23e-06	6.03e-05
KEGG pathway	Neuroactive ligand-receptor interaction	4080	272	13	2.73	4.76	4.52e-06	0.0001
KEGG pathway	Type II diabetes mellitus	4930	48	6	0.48	12.45	8.5e-06	0.0002
KEGG pathway	Calcium signaling pathway	4020	177	10	1.78	5.63	1.36e-05	0.0002
KEGG pathway	Regulation of actin cytoskeleton	4810	213	11	2.14	5.14	1.19e-05	0.0002
KEGG pathway	Tight junction	4530	132	8	1.33	6.04	6.03e-05	0.0008
KEGG pathway	Pathways in cancer	5200	326	12	3.27	3.67	0.0001	0.0011
KEGG pathway	Amoebiasis	5146	106	7	1.06	6.58	0.0001	0.0011
KEGG pathway	Protein digestion and absorption	4974	81	6	0.81	7.38	0.0002	0.0015
KEGG pathway	Leukocyte transendothelial migration	4670	116	7	1.16	6.01	0.0002	0.0015
KEGG pathway	Metabolic pathways	1100	1130	25	11.35	2.2	0.0002	0.0015
KEGG pathway	ECM-receptor interaction	4512	85	6	0.85	7.03	0.0002	0.0015
KEGG pathway	Acute myeloid leukemia	5221	57	5	0.57	8.74	0.0003	0.0021
KEGG pathway	Fc gamma R-mediated phagocytosis	4666	94	6	0.94	6.36	0.0004	0.0024
KEGG pathway	Colorectal cancer	5210	62	5	0.62	8.03	0.0004	0.0024
KEGG pathway	Insulin signaling pathway	4910	138	7	1.39	5.05	0.0005	0.0029
KEGG pathway	Aldosterone-regulated sodium reabsorption	4960	42	4	0.42	9.49	0.0008	0.0044
KEGG pathway	Adherens junction	4520	73	5	0.73	6.82	0.0009	0.0046
KEGG pathway	VEGF signaling pathway	4370	76	5	0.76	6.55	0.001	0.0049
KEGG pathway	Vascular smooth muscle contraction	4270	116	6	1.16	5.15	0.0012	0.0056
KEGG pathway	Purine metabolism	230	162	7	1.63	4.3	0.0013	0.0058
KEGG pathway	Alzheimer's disease	5010	167	7	1.68	4.17	0.0016	0.0068
KEGG pathway	MAPK signaling pathway	4010	268	9	2.69	3.34	0.0017	0.0069
KEGG pathway	Endometrial cancer	5213	52	4	0.52	7.66	0.0019	0.0074
KEGG pathway	Axon guidance	4360	129	6	1.3	4.63	0.002	0.0075
KEGG pathway	Parkinson's disease	5012	130	6	1.31	4.6	0.0021	0.0076
KEGG pathway	Inositol phosphate metabolism	562	57	4	0.57	6.99	0.0026	0.0091
KEGG pathway	Phagosome	4145	153	6	1.54	3.91	0.0046	0.0155
KEGG pathway	Jak-STAT signaling pathway	4630	155	6	1.56	3.86	0.0049	0.016
KEGG pathway	Long-term depression	4730	70	4	0.7	5.69	0.0055	0.0168
KEGG pathway	Renal cell carcinoma	5211	70	4	0.7	5.69	0.0055	0.0168
KEGG pathway	Gastric acid secretion	4971	74	4	0.74	5.38	0.0066	0.0196
KEGG pathway	Small cell lung cancer	5222	85	4	0.85	4.69	0.0107	0.0305
KEGG pathway	Oxidative phosphorylation	190	132	5	1.33	3.77	0.0109	0.0305
KEGG pathway	ErbB signaling pathway	4012	87	4	0.87	4.58	0.0116	0.0316
KEGG pathway	Chemokine signaling pathway	4062	189	6	1.9	3.16	0.0125	0.0322
KEGG pathway	Salivary secretion	4970	89	4	0.89	4.48	0.0125	0.0322
KEGG pathway	Gap junction	4540	90	4	0.9	4.43	0.013	0.0327
KEGG pathway	Malaria	5144	51	3	0.51	5.86	0.0147	0.036
KEGG pathway	Taste transduction	4742	52	3	0.52	5.75	0.0154	0.0368
KEGG pathway	Vibrio cholerae infection	5110	54	3	0.54	5.53	0.0171	0.039
KEGG pathway	Non-small cell lung cancer	5223	54	3	0.54	5.53	0.0171	0.039
KEGG pathway	Wnt signaling pathway	4310	150	5	1.51	3.32	0.0181	0.0403
KEGG pathway	Melanogenesis	4916	101	4	1.01	3.94	0.0191	0.0416
* Webgestalt: KEGG pathway enrichment anaysis for all RRBS_5.5 DMRs. Only Bonferroni adjusted pathways (adjP < 0.05) is included.

## Sheet: 4.RNA_RRBS_mDNAcap_default
Gene_id	RRBS_5.5	mDNAcap	RNAseq	Gene
ENSSSCG00000002457	RRBS	mDNAcap	RNAseq	ITPK1
ENSSSCG00000003687	RRBS	mDNAcap	RNAseq	EPB41L3
ENSSSCG00000003833	RRBS	mDNAcap	RNAseq	DAB1
ENSSSCG00000004012	RRBS	mDNAcap	RNAseq	THBS2
ENSSSCG00000004018	RRBS	mDNAcap	RNAseq	MLLT4
ENSSSCG00000005474	RRBS	mDNAcap	RNAseq	SAL1
ENSSSCG00000005654	RRBS	mDNAcap	RNAseq	SPTAN1
ENSSSCG00000006941	RRBS	mDNAcap	RNAseq	DDAH1
ENSSSCG00000007509	RRBS	mDNAcap	RNAseq	TMEPAI
ENSSSCG00000007574	RRBS	mDNAcap	RNAseq	SDK1
ENSSSCG00000009565	RRBS	mDNAcap	RNAseq	GAS6
ENSSSCG00000009585	RRBS	mDNAcap	RNAseq	GADD45G
ENSSSCG00000013492	RRBS	mDNAcap	RNAseq	APBA3
ENSSSCG00000014567	RRBS	mDNAcap	RNAseq	TRIM66
ENSSSCG00000016444	RRBS	mDNAcap	RNAseq	TMEM176B
ENSSSCG00000016725	RRBS	mDNAcap	RNAseq	TNS3
ENSSSCG00000017105	RRBS	mDNAcap	RNAseq	UBE2QL1
ENSSSCG00000017159	RRBS	mDNAcap	RNAseq	TBC1D16
ENSSSCG00000017164	RRBS	mDNAcap	RNAseq	TIMP2
ENSSSCG00000017328	RRBS	mDNAcap	RNAseq	ARHGAP27
ENSSSCG00000017993	RRBS	mDNAcap	RNAseq	NTN1
ENSSSCG00000022317	RRBS	mDNAcap	RNAseq	SLC38A10
ENSSSCG00000023433	RRBS	mDNAcap	RNAseq	GNA12
ENSSSCG00000023788	RRBS	mDNAcap	RNAseq	TBC1D30
ENSSSCG00000023949	RRBS	mDNAcap	RNAseq	PIM3
ENSSSCG00000024974	RRBS	mDNAcap	RNAseq	RPL13
ENSSSCG00000025423	RRBS	mDNAcap	RNAseq	KCNK5
ENSSSCG00000027952	RRBS	mDNAcap	RNAseq	ADCY5
ENSSSCG00000030016	RRBS	mDNAcap	RNAseq	PDE9A
ENSSSCG00000001695	RRBS	no_mDNAcap	RNAseq	VEGFA
ENSSSCG00000002868	RRBS	no_mDNAcap	RNAseq	PEPD
ENSSSCG00000002965	RRBS	no_mDNAcap	RNAseq	ACTN4
ENSSSCG00000004387	RRBS	no_mDNAcap	RNAseq	FOXO3
ENSSSCG00000004399	RRBS	no_mDNAcap	RNAseq	SLC22A16
ENSSSCG00000005053	RRBS	no_mDNAcap	RNAseq	SOCS4
ENSSSCG00000007642	RRBS	no_mDNAcap	RNAseq	AZGP1
ENSSSCG00000007665	RRBS	no_mDNAcap	RNAseq	IRS1
ENSSSCG00000007720	RRBS	no_mDNAcap	RNAseq	GTF2IRD1
ENSSSCG00000010700	RRBS	no_mDNAcap	RNAseq	NSMCE4A
ENSSSCG00000012409	RRBS	no_mDNAcap	RNAseq	CITED1
ENSSSCG00000014277	RRBS	no_mDNAcap	RNAseq	IRF1
ENSSSCG00000017178	RRBS	no_mDNAcap	RNAseq	SPHK1
ENSSSCG00000017525	RRBS	no_mDNAcap	RNAseq	NFE2L1
ENSSSCG00000017769	RRBS	no_mDNAcap	RNAseq	RAB34
ENSSSCG00000021418	RRBS	no_mDNAcap	RNAseq	LSS
ENSSSCG00000022506	RRBS	no_mDNAcap	RNAseq	COL6A1
ENSSSCG00000023124	RRBS	no_mDNAcap	RNAseq	ADD1
ENSSSCG00000023371	RRBS	no_mDNAcap	RNAseq	EHD2
ENSSSCG00000028022	RRBS	no_mDNAcap	RNAseq	COL6A2
ENSSSCG00000028964	RRBS	no_mDNAcap	RNAseq	PIM2
ENSSSCG00000030707	RRBS	no_mDNAcap	RNAseq	INPP5K
ENSSSCG00000000018	no_RRBS	mDNAcap	RNAseq	KIAA0930
ENSSSCG00000000233	no_RRBS	mDNAcap	RNAseq	ACVR1B
ENSSSCG00000000968	no_RRBS	mDNAcap	RNAseq	SBF1
ENSSSCG00000000973	no_RRBS	mDNAcap	RNAseq	SELO
ENSSSCG00000000975	no_RRBS	mDNAcap	RNAseq	PANX2
ENSSSCG00000001008	no_RRBS	mDNAcap	RNAseq	BPHL
ENSSSCG00000001054	no_RRBS	mDNAcap	RNAseq	GFOD1
ENSSSCG00000001078	no_RRBS	mDNAcap	RNAseq	MBOAT1
ENSSSCG00000001488	no_RRBS	mDNAcap	RNAseq	GCLC
ENSSSCG00000001499	no_RRBS	mDNAcap	RNAseq	DST
ENSSSCG00000001770	no_RRBS	mDNAcap	RNAseq	CTSH
ENSSSCG00000002009	no_RRBS	mDNAcap	RNAseq	PCK2
ENSSSCG00000002013	no_RRBS	mDNAcap	RNAseq	DHRS4
ENSSSCG00000002265	no_RRBS	mDNAcap	RNAseq	FAM174B
ENSSSCG00000002383	no_RRBS	mDNAcap	RNAseq	FOS
ENSSSCG00000002425	no_RRBS	mDNAcap	RNAseq	PTPN21
ENSSSCG00000002558	no_RRBS	mDNAcap	RNAseq	CEP170B
ENSSSCG00000002806	no_RRBS	mDNAcap	RNAseq	MMP15
ENSSSCG00000002829	no_RRBS	mDNAcap	RNAseq	MMP2
ENSSSCG00000002866	no_RRBS	mDNAcap	RNAseq	CEBPA
ENSSSCG00000003107	no_RRBS	mDNAcap	RNAseq	ARHGAP35
ENSSSCG00000003377	no_RRBS	mDNAcap	RNAseq	ACOT7
ENSSSCG00000003396	no_RRBS	mDNAcap	RNAseq	CLSTN1
ENSSSCG00000003513	no_RRBS	mDNAcap	RNAseq	ECE1
ENSSSCG00000003543	no_RRBS	mDNAcap	RNAseq	NIPAL3
ENSSSCG00000003702	no_RRBS	mDNAcap	RNAseq	GATA6
ENSSSCG00000003707	no_RRBS	mDNAcap	RNAseq	NPC1
ENSSSCG00000003744	no_RRBS	mDNAcap	RNAseq	MOCOS
ENSSSCG00000003764	no_RRBS	mDNAcap	RNAseq	PTGFR
ENSSSCG00000003914	no_RRBS	mDNAcap	RNAseq	PRDX1
ENSSSCG00000004052	no_RRBS	mDNAcap	RNAseq	FNDC1
ENSSSCG00000004082	no_RRBS	mDNAcap	RNAseq	ensembl
ENSSSCG00000004154	no_RRBS	mDNAcap	RNAseq	TNFAIP3
ENSSSCG00000004203	no_RRBS	mDNAcap	RNAseq	L3MBTL3
ENSSSCG00000004209	no_RRBS	mDNAcap	RNAseq	PTPRK
ENSSSCG00000004658	no_RRBS	mDNAcap	RNAseq	FBN1
ENSSSCG00000004823	no_RRBS	mDNAcap	RNAseq	LRRK1
ENSSSCG00000004857	no_RRBS	mDNAcap	RNAseq	ATP9B
ENSSSCG00000004918	no_RRBS	mDNAcap	RNAseq	ALPK2
ENSSSCG00000005183	no_RRBS	mDNAcap	RNAseq	PSIP1
ENSSSCG00000005467	no_RRBS	mDNAcap	RNAseq	HSDL2
ENSSSCG00000005710	no_RRBS	mDNAcap	RNAseq	LAMC3
ENSSSCG00000005719	no_RRBS	mDNAcap	RNAseq	RAPGEF1
ENSSSCG00000005841	no_RRBS	mDNAcap	RNAseq	RABL6
ENSSSCG00000005965	no_RRBS	mDNAcap	RNAseq	MYC
ENSSSCG00000006114	no_RRBS	mDNAcap	RNAseq	ensembl
ENSSSCG00000006243	no_RRBS	mDNAcap	RNAseq	PENK
ENSSSCG00000006550	no_RRBS	mDNAcap	RNAseq	ATP8B2
ENSSSCG00000006717	no_RRBS	mDNAcap	RNAseq	PHGDH
ENSSSCG00000006891	no_RRBS	mDNAcap	RNAseq	GCLM
ENSSSCG00000006894	no_RRBS	mDNAcap	RNAseq	FNBP1L
ENSSSCG00000007052	no_RRBS	mDNAcap	RNAseq	FERMT1
ENSSSCG00000007067	no_RRBS	mDNAcap	RNAseq	JAG1
ENSSSCG00000007463	no_RRBS	mDNAcap	RNAseq	PTGIS
ENSSSCG00000007505	no_RRBS	mDNAcap	RNAseq	CTCFL
ENSSSCG00000007507	no_RRBS	mDNAcap	RNAseq	PCK1
ENSSSCG00000007513	no_RRBS	mDNAcap	RNAseq	RAB22A
ENSSSCG00000007517	no_RRBS	mDNAcap	RNAseq	NPEPL1
ENSSSCG00000007558	no_RRBS	mDNAcap	RNAseq	INTS1
ENSSSCG00000007718	no_RRBS	mDNAcap	RNAseq	CLDN4
ENSSSCG00000007815	no_RRBS	mDNAcap	RNAseq	GTF3C1
ENSSSCG00000007899	no_RRBS	mDNAcap	RNAseq	ensembl
ENSSSCG00000008051	no_RRBS	mDNAcap	RNAseq	ABCA3
ENSSSCG00000008254	no_RRBS	mDNAcap	RNAseq	ensembl
ENSSSCG00000008439	no_RRBS	mDNAcap	RNAseq	RHOQ
ENSSSCG00000008593	no_RRBS	mDNAcap	RNAseq	KLHL29
ENSSSCG00000008617	no_RRBS	mDNAcap	RNAseq	FAM49A
ENSSSCG00000008631	no_RRBS	mDNAcap	RNAseq	PQLC3
ENSSSCG00000008697	no_RRBS	mDNAcap	RNAseq	HTT
ENSSSCG00000008698	no_RRBS	mDNAcap	RNAseq	RGS12
ENSSSCG00000008724	no_RRBS	mDNAcap	RNAseq	ACOX3
ENSSSCG00000008732	no_RRBS	mDNAcap	RNAseq	TMEM128
ENSSSCG00000008774	no_RRBS	mDNAcap	RNAseq	TBC1D1
ENSSSCG00000008792	no_RRBS	mDNAcap	RNAseq	N4BP2
ENSSSCG00000008796	no_RRBS	mDNAcap	RNAseq	RBM47
ENSSSCG00000008842	no_RRBS	mDNAcap	RNAseq	KIT
ENSSSCG00000008844	no_RRBS	mDNAcap	RNAseq	KDR
ENSSSCG00000008984	no_RRBS	mDNAcap	RNAseq	SHROOM3
ENSSSCG00000009060	no_RRBS	mDNAcap	RNAseq	MAML3
ENSSSCG00000009144	no_RRBS	mDNAcap	RNAseq	AGXT2L1
ENSSSCG00000009230	no_RRBS	mDNAcap	RNAseq	WDFY3
ENSSSCG00000009233	no_RRBS	mDNAcap	RNAseq	AGPAT9
ENSSSCG00000009391	no_RRBS	mDNAcap	RNAseq	KPNA3
ENSSSCG00000009422	no_RRBS	mDNAcap	RNAseq	TSC22D1
ENSSSCG00000009489	no_RRBS	mDNAcap	RNAseq	GPC6
ENSSSCG00000009500	no_RRBS	mDNAcap	RNAseq	CLDN10
ENSSSCG00000009511	no_RRBS	mDNAcap	RNAseq	STK24
ENSSSCG00000009650	no_RRBS	mDNAcap	RNAseq	DOCK5
ENSSSCG00000009672	no_RRBS	mDNAcap	RNAseq	SCARA5
ENSSSCG00000009761	no_RRBS	mDNAcap	RNAseq	NCOR2
ENSSSCG00000009885	no_RRBS	mDNAcap	RNAseq	HECTD4
ENSSSCG00000010158	no_RRBS	mDNAcap	RNAseq	TOMM20
ENSSSCG00000010219	no_RRBS	mDNAcap	RNAseq	ARID5B
ENSSSCG00000010267	no_RRBS	mDNAcap	RNAseq	LRRC20
ENSSSCG00000010385	no_RRBS	mDNAcap	RNAseq	VSTM4
ENSSSCG00000010512	no_RRBS	mDNAcap	RNAseq	SLIT1
ENSSSCG00000010643	no_RRBS	mDNAcap	RNAseq	PLEKHS1
ENSSSCG00000010651	no_RRBS	mDNAcap	RNAseq	ABLIM1
ENSSSCG00000010756	no_RRBS	mDNAcap	RNAseq	MGMT
ENSSSCG00000010806	no_RRBS	mDNAcap	RNAseq	RGS2
ENSSSCG00000010814	no_RRBS	mDNAcap	RNAseq	ESRRG
ENSSSCG00000010817	no_RRBS	mDNAcap	RNAseq	LYPLAL1
ENSSSCG00000010831	no_RRBS	mDNAcap	RNAseq	DUSP10
ENSSSCG00000010850	no_RRBS	mDNAcap	RNAseq	ENAH
ENSSSCG00000010872	no_RRBS	mDNAcap	RNAseq	AKT3
ENSSSCG00000010886	no_RRBS	mDNAcap	RNAseq	ensembl
ENSSSCG00000010893	no_RRBS	mDNAcap	RNAseq	CFH
ENSSSCG00000010934	no_RRBS	mDNAcap	RNAseq	HABP4
ENSSSCG00000010944	no_RRBS	mDNAcap	RNAseq	FBP1
ENSSSCG00000011079	no_RRBS	mDNAcap	RNAseq	PIP4K2A
ENSSSCG00000011090	no_RRBS	mDNAcap	RNAseq	NEBL
ENSSSCG00000011102	no_RRBS	mDNAcap	RNAseq	NRP1
ENSSSCG00000011157	no_RRBS	mDNAcap	RNAseq	PITRM1
ENSSSCG00000011158	no_RRBS	mDNAcap	RNAseq	PFKP
ENSSSCG00000011398	no_RRBS	mDNAcap	RNAseq	SEMA3F
ENSSSCG00000011576	no_RRBS	mDNAcap	RNAseq	HRH1
ENSSSCG00000011681	no_RRBS	mDNAcap	RNAseq	TRPC1
ENSSSCG00000012054	no_RRBS	mDNAcap	RNAseq	DOPEY2
ENSSSCG00000012059	no_RRBS	mDNAcap	RNAseq	HLCS
ENSSSCG00000012076	no_RRBS	mDNAcap	RNAseq	MX2
ENSSSCG00000012822	no_RRBS	mDNAcap	RNAseq	MPP1
ENSSSCG00000012850	no_RRBS	mDNAcap	RNAseq	DEAF1
ENSSSCG00000012880	no_RRBS	mDNAcap	RNAseq	CPT1A
ENSSSCG00000012955	no_RRBS	mDNAcap	RNAseq	KLC2
ENSSSCG00000012956	no_RRBS	mDNAcap	RNAseq	PACS1
ENSSSCG00000013292	no_RRBS	mDNAcap	RNAseq	PRR5L
ENSSSCG00000013303	no_RRBS	mDNAcap	RNAseq	ABTB2
ENSSSCG00000013426	no_RRBS	mDNAcap	RNAseq	MUM1
ENSSSCG00000014070	no_RRBS	mDNAcap	RNAseq	ANKRA2
ENSSSCG00000014133	no_RRBS	mDNAcap	RNAseq	RPS23
ENSSSCG00000014310	no_RRBS	mDNAcap	RNAseq	CXCL14
ENSSSCG00000014420	no_RRBS	mDNAcap	RNAseq	JAKMIP2
ENSSSCG00000014570	no_RRBS	mDNAcap	RNAseq	NRIP3
ENSSSCG00000014575	no_RRBS	mDNAcap	RNAseq	SCUBE2
ENSSSCG00000014579	no_RRBS	mDNAcap	RNAseq	TMEM41B
ENSSSCG00000014861	no_RRBS	mDNAcap	RNAseq	MOGAT2
ENSSSCG00000014876	no_RRBS	mDNAcap	RNAseq	MYO7A
ENSSSCG00000014891	no_RRBS	mDNAcap	RNAseq	GAB2
ENSSSCG00000014921	no_RRBS	mDNAcap	RNAseq	PRSS23
ENSSSCG00000014966	no_RRBS	mDNAcap	RNAseq	SESN3
ENSSSCG00000014994	no_RRBS	mDNAcap	RNAseq	PDGFD
ENSSSCG00000015015	no_RRBS	mDNAcap	RNAseq	ARHGAP20
ENSSSCG00000015299	no_RRBS	mDNAcap	RNAseq	STEAP4
ENSSSCG00000015631	no_RRBS	mDNAcap	RNAseq	GRB10
ENSSSCG00000015945	no_RRBS	mDNAcap	RNAseq	METTL8
ENSSSCG00000016340	no_RRBS	mDNAcap	RNAseq	ASB1
ENSSSCG00000016342	no_RRBS	mDNAcap	RNAseq	HES6
ENSSSCG00000016367	no_RRBS	mDNAcap	RNAseq	RNPEPL1
ENSSSCG00000016431	no_RRBS	mDNAcap	RNAseq	GALNTL5
ENSSSCG00000016579	no_RRBS	mDNAcap	RNAseq	CCDC136
ENSSSCG00000016585	no_RRBS	mDNAcap	RNAseq	IMPDH1
ENSSSCG00000016709	no_RRBS	mDNAcap	RNAseq	SNX10
ENSSSCG00000016831	no_RRBS	mDNAcap	RNAseq	SPEF2
ENSSSCG00000016981	no_RRBS	mDNAcap	RNAseq	CPEB4
ENSSSCG00000017063	no_RRBS	mDNAcap	RNAseq	SGCD
ENSSSCG00000017095	no_RRBS	mDNAcap	RNAseq	SEMA5A
ENSSSCG00000017106	no_RRBS	mDNAcap	RNAseq	MED10
ENSSSCG00000017116	no_RRBS	mDNAcap	RNAseq	LPCAT1
ENSSSCG00000017136	no_RRBS	mDNAcap	RNAseq	TBCD
ENSSSCG00000017137	no_RRBS	mDNAcap	RNAseq	METRNL
ENSSSCG00000017181	no_RRBS	mDNAcap	RNAseq	CYGB
ENSSSCG00000017186	no_RRBS	mDNAcap	RNAseq	RNF157
ENSSSCG00000017239	no_RRBS	mDNAcap	RNAseq	RPL38
ENSSSCG00000017254	no_RRBS	mDNAcap	RNAseq	MAP2K6
ENSSSCG00000017268	no_RRBS	mDNAcap	RNAseq	PRKCA
ENSSSCG00000017274	no_RRBS	mDNAcap	RNAseq	PITPNC1
ENSSSCG00000017340	no_RRBS	mDNAcap	RNAseq	DCAKD
ENSSSCG00000017415	no_RRBS	mDNAcap	RNAseq	TTC25
ENSSSCG00000017561	no_RRBS	mDNAcap	RNAseq	ABCC3
ENSSSCG00000017670	no_RRBS	mDNAcap	RNAseq	RPS6KB1
ENSSSCG00000017743	no_RRBS	mDNAcap	RNAseq	CRLF3
ENSSSCG00000018045	no_RRBS	mDNAcap	RNAseq	ULK2
ENSSSCG00000020672	no_RRBS	mDNAcap	RNAseq	F2R
ENSSSCG00000020783	no_RRBS	mDNAcap	RNAseq	SLC41A1
ENSSSCG00000021241	no_RRBS	mDNAcap	RNAseq	ADAMTS13
ENSSSCG00000021251	no_RRBS	mDNAcap	RNAseq	SLC12A7
ENSSSCG00000021261	no_RRBS	mDNAcap	RNAseq	ensembl
ENSSSCG00000021273	no_RRBS	mDNAcap	RNAseq	ensembl
ENSSSCG00000021529	no_RRBS	mDNAcap	RNAseq	KLF11
ENSSSCG00000021712	no_RRBS	mDNAcap	RNAseq	HERC6
ENSSSCG00000021818	no_RRBS	mDNAcap	RNAseq	ENOX1
ENSSSCG00000021829	no_RRBS	mDNAcap	RNAseq	ensembl
ENSSSCG00000022204	no_RRBS	mDNAcap	RNAseq	AGRN
ENSSSCG00000022284	no_RRBS	mDNAcap	RNAseq	DUSP6
ENSSSCG00000023228	no_RRBS	mDNAcap	RNAseq	NUMBL
ENSSSCG00000023333	no_RRBS	mDNAcap	RNAseq	FCN2
ENSSSCG00000023633	no_RRBS	mDNAcap	RNAseq	ensembl
ENSSSCG00000023728	no_RRBS	mDNAcap	RNAseq	TBCEL
ENSSSCG00000023762	no_RRBS	mDNAcap	RNAseq	TRPM2
ENSSSCG00000023866	no_RRBS	mDNAcap	RNAseq	ACSF3
ENSSSCG00000023978	no_RRBS	mDNAcap	RNAseq	RECQL5
ENSSSCG00000024045	no_RRBS	mDNAcap	RNAseq	CAST2
ENSSSCG00000024055	no_RRBS	mDNAcap	RNAseq	TECPR2
ENSSSCG00000024240	no_RRBS	mDNAcap	RNAseq	CCDC9
ENSSSCG00000024341	no_RRBS	mDNAcap	RNAseq	USP20
ENSSSCG00000024413	no_RRBS	mDNAcap	RNAseq	PPP2R1A
ENSSSCG00000024481	no_RRBS	mDNAcap	RNAseq	PDE4DIP
ENSSSCG00000024899	no_RRBS	mDNAcap	RNAseq	FAM101B
ENSSSCG00000024954	no_RRBS	mDNAcap	RNAseq	FGF1
ENSSSCG00000025139	no_RRBS	mDNAcap	RNAseq	ZNF507
ENSSSCG00000025492	no_RRBS	mDNAcap	RNAseq	NUDT13
ENSSSCG00000025517	no_RRBS	mDNAcap	RNAseq	ensembl
ENSSSCG00000025525	no_RRBS	mDNAcap	RNAseq	GATD3A
ENSSSCG00000025689	no_RRBS	mDNAcap	RNAseq	DVL2
ENSSSCG00000025711	no_RRBS	mDNAcap	RNAseq	MEIOB
ENSSSCG00000026283	no_RRBS	mDNAcap	RNAseq	UBXN2A
ENSSSCG00000026320	no_RRBS	mDNAcap	RNAseq	SPINK2
ENSSSCG00000026453	no_RRBS	mDNAcap	RNAseq	ACSM5
ENSSSCG00000026473	no_RRBS	mDNAcap	RNAseq	ABCA8
ENSSSCG00000027055	no_RRBS	mDNAcap	RNAseq	NUAK1
ENSSSCG00000027165	no_RRBS	mDNAcap	RNAseq	UBE2G2
ENSSSCG00000027308	no_RRBS	mDNAcap	RNAseq	MAPK12
ENSSSCG00000027331	no_RRBS	mDNAcap	RNAseq	COL6A3
ENSSSCG00000027478	no_RRBS	mDNAcap	RNAseq	PPCDC
ENSSSCG00000027607	no_RRBS	mDNAcap	RNAseq	IER3
ENSSSCG00000028135	no_RRBS	mDNAcap	RNAseq	PRTFDC1
ENSSSCG00000028755	no_RRBS	mDNAcap	RNAseq	TSSC1
ENSSSCG00000028852	no_RRBS	mDNAcap	RNAseq	ensembl
ENSSSCG00000029219	no_RRBS	mDNAcap	RNAseq	SH3BGR
ENSSSCG00000029236	no_RRBS	mDNAcap	RNAseq	ZBTB7A
ENSSSCG00000029475	no_RRBS	mDNAcap	RNAseq	ensembl
ENSSSCG00000029570	no_RRBS	mDNAcap	RNAseq	PXDN
ENSSSCG00000029876	no_RRBS	mDNAcap	RNAseq	SOD2
ENSSSCG00000030167	no_RRBS	mDNAcap	RNAseq	SLC25A39
ENSSSCG00000030876	no_RRBS	mDNAcap	RNAseq	RBP5

## Sheet: 5.Combined_KEGG
	Pathway	ID	Gene set genes	Genes in the pathway	Expected geness	Ratio of enrichment	RawP	adjP
KEGG pathway	Focal adhesion	4510	200	13	1.2	10.82	3.19e-10	2.93e-08
KEGG pathway	Insulin signaling pathway	4910	138	10	0.83	12.07	1.29e-08	5.93e-07
KEGG pathway	Tight junction	4530	132	9	0.79	11.35	1.18e-07	3.62e-06
KEGG pathway	Leukocyte transendothelial migration	4670	116	8	0.7	11.48	5.51e-07	1.27e-05
KEGG pathway	MAPK signaling pathway	4010	268	11	1.61	6.83	7.95e-07	1.46e-05
KEGG pathway	Acute myeloid leukemia	5221	57	6	0.34	17.53	1.24e-06	1.9e-05
KEGG pathway	Metabolic pathways	1100	1130	22	6.79	3.24	1.61e-06	2.12e-05
KEGG pathway	Pathways in cancer	5200	326	11	1.96	5.62	5.25e-06	6.04e-05
KEGG pathway	VEGF signaling pathway	4370	76	6	0.46	13.15	6.81e-06	6.96e-05
KEGG pathway	Notch signaling pathway	4330	47	5	0.28	17.71	9.38e-06	8.63e-05
KEGG pathway	ECM-receptor interaction	4512	85	6	0.51	11.75	1.3e-05	0.0001
KEGG pathway	Regulation of actin cytoskeleton	4810	213	8	1.28	6.25	4.85e-05	0.0004
KEGG pathway	Adipocytokine signaling pathway	4920	68	5	0.41	12.24	5.75e-05	0.0004
KEGG pathway	Fc epsilon RI signaling pathway	4664	79	5	0.47	10.54	0.0001	0.0006
KEGG pathway	Axon guidance	4360	129	6	0.77	7.74	0.0001	0.0006
KEGG pathway	Hepatitis C	5160	134	6	0.8	7.46	0.0002	0.0011
KEGG pathway	mTOR signaling pathway	4150	52	4	0.31	12.81	0.0003	0.0015
KEGG pathway	Fc gamma R-mediated phagocytosis	4666	94	5	0.56	8.86	0.0003	0.0015
KEGG pathway	GnRH signaling pathway	4912	101	5	0.61	8.24	0.0004	0.0019
KEGG pathway	Glycolysis/Gluconeogenesis	10	65	4	0.39	10.25	0.0006	0.0028
KEGG pathway	Calcium signaling pathway	4020	177	6	1.06	5.64	0.0007	0.0031
KEGG pathway	PPAR signaling pathway	3320	70	4	0.42	9.52	0.0009	0.0038
KEGG pathway	Osteoclast differentiation	4380	128	5	0.77	6.5	0.0011	0.0042
KEGG pathway	Neurotrophin signaling pathway	4722	127	5	0.76	6.56	0.0011	0.0042
KEGG pathway	Peroxisome	4146	79	4	0.47	8.43	0.0013	0.0046
KEGG pathway	Phosphatidylinositol signaling system	4070	78	4	0.47	8.54	0.0013	0.0046
KEGG pathway	Protein digestion and absorption	4974	81	4	0.49	8.22	0.0015	0.0051
KEGG pathway	TGF-beta signaling pathway	4350	84	4	0.5	7.93	0.0017	0.0056
KEGG pathway	ErbB signaling pathway	4012	87	4	0.52	7.66	0.0019	0.006
KEGG pathway	Bladder cancer	5219	42	3	0.25	11.89	0.0021	0.0064
KEGG pathway	ABC transporters	2010	44	3	0.26	11.35	0.0024	0.0071
KEGG pathway	Melanogenesis	4916	101	4	0.61	6.59	0.0033	0.0095
KEGG pathway	Toll-like receptor signaling pathway	4620	102	4	0.61	6.53	0.0034	0.0095
KEGG pathway	Chagas disease (American trypanosomiasis)	5142	104	4	0.62	6.4	0.0037	0.01
KEGG pathway	Endometrial cancer	5213	52	3	0.31	9.61	0.0038	0.01
KEGG pathway	Non-small cell lung cancer	5223	54	3	0.32	9.25	0.0042	0.0107
KEGG pathway	Inositol phosphate metabolism	562	57	3	0.34	8.76	0.0049	0.0122
KEGG pathway	Colorectal cancer	5210	62	3	0.37	8.06	0.0062	0.015
KEGG pathway	Biosynthesis of unsaturated fatty acids	1040	21	2	0.13	15.86	0.007	0.0165
KEGG pathway	Endocytosis	4144	201	5	1.21	4.14	0.0075	0.0173
KEGG pathway	Long-term depression	4730	70	3	0.42	7.14	0.0087	0.0182
KEGG pathway	Toxoplasmosis	5145	132	4	0.79	5.05	0.0084	0.0182
KEGG pathway	Proximal tubule bicarbonate reclamation	4964	23	2	0.14	14.48	0.0084	0.0182
KEGG pathway	Renal cell carcinoma	5211	70	3	0.42	7.14	0.0087	0.0182
KEGG pathway	Melanoma	5218	71	3	0.43	7.04	0.0091	0.0186
KEGG pathway	Chronic myeloid leukemia	5220	73	3	0.44	6.84	0.0098	0.0196
KEGG pathway	Pentose phosphate pathway	30	27	2	0.16	12.33	0.0114	0.0223
KEGG pathway	Glycerophospholipid metabolism	564	80	3	0.48	6.24	0.0125	0.024
KEGG pathway	Wnt signaling pathway	4310	150	4	0.9	4.44	0.013	0.0244
KEGG pathway	Citrate cycle (TCA cycle)	20	30	2	0.18	11.1	0.014	0.0258
KEGG pathway	Small cell lung cancer	5222	85	3	0.51	5.88	0.0147	0.0265
KEGG pathway	Progesterone-mediated oocyte maturation	4914	86	3	0.52	5.81	0.0152	0.0269
KEGG pathway	Gap junction	4540	90	3	0.54	5.55	0.0171	0.0297
KEGG pathway	Ribosome	3010	92	3	0.55	5.43	0.0182	0.031
KEGG pathway	Fructose and mannose metabolism	51	36	2	0.22	9.25	0.0198	0.0331
KEGG pathway	Cytokine-cytokine receptor interaction	4060	265	5	1.59	3.14	0.0224	0.0368
KEGG pathway	Pancreatic secretion	4972	101	3	0.61	4.95	0.0232	0.0374
KEGG pathway	Pyruvate metabolism	620	40	2	0.24	8.33	0.0241	0.0382
KEGG pathway	Amoebiasis	5146	106	3	0.64	4.71	0.0263	0.0405
KEGG pathway	T cell receptor signaling pathway	4660	108	3	0.65	4.63	0.0276	0.0405
KEGG pathway	Fatty acid metabolism	71	43	2	0.26	7.74	0.0276	0.0405
KEGG pathway	Chemokine signaling pathway	4062	189	4	1.14	3.52	0.0277	0.0405
KEGG pathway	Aldosterone-regulated sodium reabsorption	4960	42	2	0.25	7.93	0.0264	0.0405
KEGG pathway	Oocyte meiosis	4114	112	3	0.67	4.46	0.0302	0.0434
KEGG pathway	Vascular smooth muscle contraction	4270	116	3	0.7	4.31	0.033	0.0467
KEGG pathway	Type II diabetes mellitus	4930	48	2	0.29	6.94	0.0338	0.0471
KEGG pathway	Glycerolipid metabolism	561	50	2	0.3	6.66	0.0364	0.0492
KEGG pathway	Glutathione metabolism	480	50	2	0.3	6.66	0.0364	0.0492
